# Supplementary material
Source: PubMed Central journal article supplement (PMC6467061)
Supplement: NIHMS1005425-supplement-Supplementary_material.pdf [file NIHMS1005425-supplement-Supplementary_material.pdf]

# Local Phase Velocity Based Imaging (LPVI): A New Technique Used For Ultrasound Shear Wave Elastography - Supplementary Material

Tables S1-S3 present mean, median, standard deviation, variance, maximum and minimum values of shear wave velocity calculated for the liver fibrosis tissue mimicking homogeneous phantoms using the LPVI approach. Results are presented for phantoms with nominal Young's moduli of 10, 25 and 45 kPa, respectively.

Figure S1 shows the bias of the mean phase velocity computed for the homogeneous liver fibrosis tissue mimicking phantoms for various frequencies and the spatial window dimensions for LPVI. Bias was calculated using an expression

$$Bias = \frac{\bar{c}_{ph}^{LPVI} - c_{ph}^{NOM}}{c_{ph}^{NOM}} \cdot 100\% \quad (S1)$$

where  $\bar{c}_{ph}^{LPVI}$  is a mean phase velocity within ROI calculated using LPVI.  $c_{ph}^{NOM}$  is a true phase velocity computed twofold: (1) using known elasticity and density via an expression  $c_{ph}^{NOM} = \sqrt{E/(3\rho)}$  or (2) using a classical two-dimensional Fourier transform (2D-FT) method in order to calculate dispersion curves.

Data in Fig. S1 are presented for the liver fibrosis tissue mimicking homogeneous phantoms for ROIs presented in Fig. 3 in the main manuscript.

Figures S2 and S3 show bias of the mean phase velocity computed for LISA data and CIRS phantom from an inclusion phantom with 6.49 mm diameter for background and inclusion, respectively. ROIs for the background and inclusion are marked in Fig. 2 in the main manuscript. Results are presented for various frequencies and the spatial window dimensions for (a) nominal elasticity provided by manufacturer, and (b) phase velocity calculated using classical 2D-FT method shown in Fig. 8c.

Figure S4 presents two-dimensional shear wave phase velocity images for the CIRS phantom with an inclusion Type IV and size of 10.40 mm (top row), 6.49 mm (middle row) and 4.05 mm (bottom row) of diameter, respectively. Phase velocity images were calculated using LPVI approach. Similar images for inclusions Type III, II and I are presented in Figs. S6, S9 and S11, respectively. Dashed lines present the true inclusion locations estimated from B-modes images. For higher frequencies, starting from approximately 900 Hz, spurious peaks can be observed for inclusions Type I and II which are softer than surrounding background. Softer inclusion suppresses traveling higher frequency components of shear wave before it passes the inclusion through. It is illustrated in Fig. S8 for the inclusion Type II and size of 10.4 mm. The shear wave traveling from the left to the right side of the inclusion (Fig. S8a) could not propagate over that distance.

As a result, artifacts in the reconstructed images are present in the bottom right corner. Similar effects are observed when the shear wave travels from the right towards the left side, Fig. S8b. Fig. S8c shows averaged image from maps depicted in Figs. S8a and S8b.

Figure S5 presents two-dimensional shear wave phase velocity images for the CIRS phantom with an inclusion Type IV and size of 10.40 mm (top row), 6.49 mm (middle row) and 4.05 mm (bottom row) of diameter, respectively. Phase velocity images were calculated using phase velocity approach described by Budelli et al. [24]. Similar images for the same method for inclusions Type III, II and I are presented in Figs. S7, S10 and S12, respectively. Dashed lines present true inclusion locations estimated from B-modes images. One can notice that method presented by Budelli et al. is much more influenced by noise. This is visible for all types of inclusion. Moreover, it is even more pronounced for softer inclusions (Type I and II). One of the reasons for that behavior might be that this technique is based on a phase gradient search which is susceptible to changes observed in measured shear wave signal. Secondly, only the lateral direction is taken into account when reconstructing shear wave velocity maps. At the same time LPVI takes into account information from both lateral and axial directions.

Tables S4, S6, S8 and S10 present mean, median, standard deviation, variance, maximum and minimum values of shear wave velocity calculated for the inclusion Type IV, III, II and I, respectively, for the LPVI approach.

Tables S5, S7, S9 and S11 present mean, median, standard deviation, variance, maximum and minimum values of shear wave velocity calculated for the inclusion Type IV, III, II and I, respectively, for phase velocity approach described by Budelli et al. [24].

We used a threshold of 7 m/s when calculating aforementioned values for LPVI and Budelli et al.'s methods in order to bypass spurious phase velocity values higher than 7 m/s.

Figure S13 presents the contrast-to-noise ratio (CNR) estimated for the LPVI, computed for various frequencies and the spatial window dimensions, calculated for the gelatin phantom experimental data presented in Fig. 16 in the main manuscript.

TABLE S1: Mean, median, standard deviation, variance, maximum and minimum values of shear wave velocity calculated for the liver fibrosis tissue mimicking homogeneous phantom for LPVI approach. Values are presented in the unit of m/s. A nominal Young's modulus provided by the manufacturer is 10 kPa ( $c = 1.826$  m/s). Window size used for LPVI was  $3.5 \times 3.5$  mm.

| Young's modulus | Variable | Frequency [Hz] |       |       |       |       |
|-----------------|----------|----------------|-------|-------|-------|-------|
|                 |          | 100            | 200   | 300   | 400   | 500   |
| 10 kPa          | MEAN     | 1.630          | 1.640 | 1.621 | 1.610 | 1.610 |
|                 | MEDIAN   | 1.606          | 1.672 | 1.626 | 1.601 | 1.604 |
|                 | STD      | 0.086          | 0.072 | 0.054 | 0.034 | 0.038 |
|                 | VAR      | 0.007          | 0.005 | 0.003 | 0.001 | 0.001 |
|                 | MAX      | 1.846          | 1.820 | 1.820 | 1.736 | 1.731 |
|                 | MIN      | 1.455          | 1.475 | 1.521 | 1.524 | 1.512 |

TABLE S2: Mean, median, standard deviation, variance, maximum and minimum values of shear wave velocity calculated for the liver fibrosis tissue mimicking homogeneous phantom for LPVI approach. Values are presented in the unit of m/s. A nominal Young's modulus provided by the manufacturer is 25 kPa ( $c = 2.887$  m/s). Window size used for LPVI was  $3.5 \times 3.5$  mm.

| Young's modulus | Variable | Frequency [Hz] |       |       |       |       |       |
|-----------------|----------|----------------|-------|-------|-------|-------|-------|
|                 |          | 100            | 200   | 300   | 400   | 500   | 600   |
| 25 kPa          | MEAN     | 2.435          | 2.433 | 2.428 | 2.431 | 2.431 | 2.432 |
|                 | MEDIAN   | 2.421          | 2.427 | 2.420 | 2.425 | 2.438 | 2.424 |
|                 | STD      | 0.058          | 0.045 | 0.052 | 0.046 | 0.040 | 0.047 |
|                 | VAR      | 0.003          | 0.002 | 0.003 | 0.002 | 0.002 | 0.002 |
|                 | MAX      | 2.580          | 2.569 | 2.620 | 2.573 | 2.572 | 2.627 |
|                 | MIN      | 2.246          | 2.281 | 2.291 | 2.291 | 2.263 | 2.281 |

TABLE S3: Mean, median, standard deviation, variance, maximum and minimum values of shear wave velocity calculated for the liver fibrosis tissue mimicking homogeneous phantom for LPVI approach. Values are presented in the unit of m/s. A nominal Young's modulus provided by the manufacturer is 45 kPa ( $c = 3.873$  m/s). Window size used for LPVI was  $3.5 \times 3.5$  mm.

| Young's modulus | Variable | Frequency [Hz] |       |       |       |       |       |
|-----------------|----------|----------------|-------|-------|-------|-------|-------|
|                 |          | 100            | 200   | 300   | 400   | 500   | 600   |
| 45 kPa          | MEAN     | 3.496          | 3.486 | 3.476 | 3.466 | 3.469 | 3.465 |
|                 | MEDIAN   | 3.493          | 3.504 | 3.491 | 3.454 | 3.471 | 3.462 |
|                 | STD      | 0.111          | 0.097 | 0.074 | 0.071 | 0.067 | 0.074 |
|                 | VAR      | 0.012          | 0.009 | 0.006 | 0.005 | 0.005 | 0.006 |
|                 | MAX      | 3.916          | 3.848 | 3.669 | 3.707 | 3.675 | 3.705 |
|                 | MIN      | 3.142          | 3.134 | 3.108 | 3.230 | 3.251 | 3.211 |

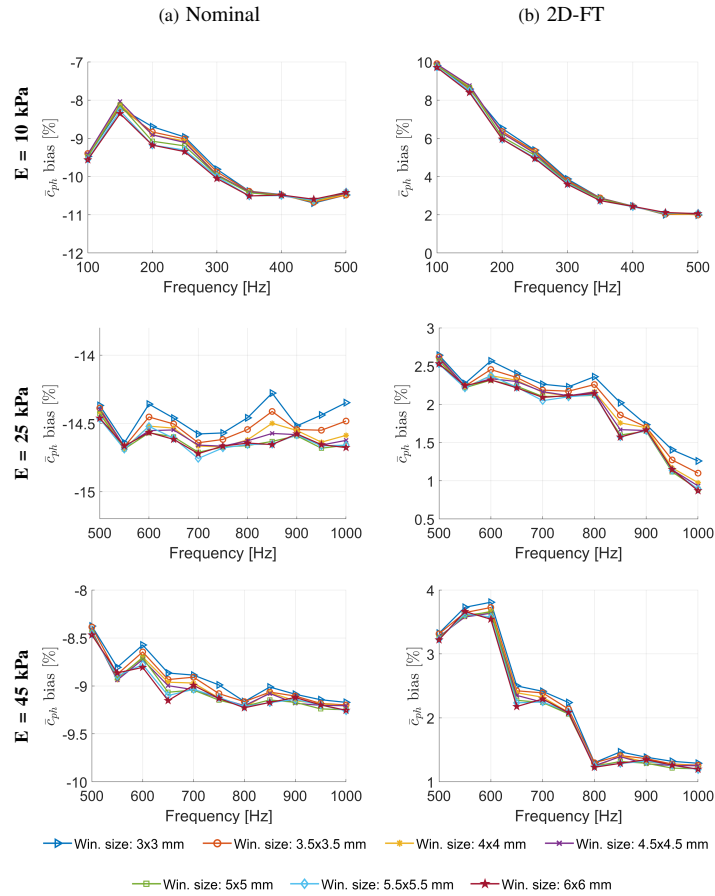

Fig. S1: Bias of the mean phase velocity computed for the homogeneous liver fibrosis tissue mimicking phantoms for various frequencies and the spatial window dimensions for LPVI. Results present bias computed against (a) nominal elasticity provided by manufacturer, and (b) phase velocity calculated using classical 2D-FT method at focused push beam depth. ROIs are presented in Fig. 3 in the main manuscript.

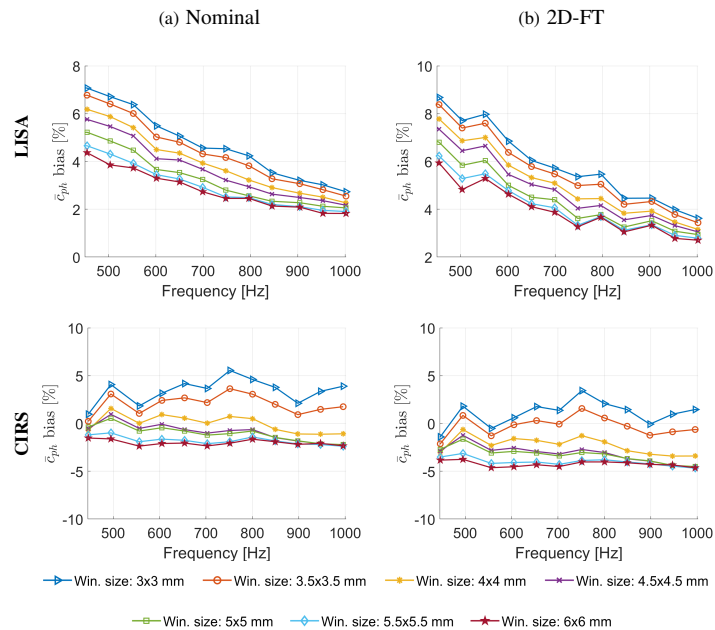

Fig. S2: Bias of the mean phase velocity computed for LISA data and CIRS phantom with stepped cylinders for background. Results are presented for various frequencies and the spatial window dimensions for (a) nominal elasticity provided by manufacturer, and (b) phase velocity calculated using classical 2D-FT method. ROI for the background is marked in Fig. 2 in the main manuscript.

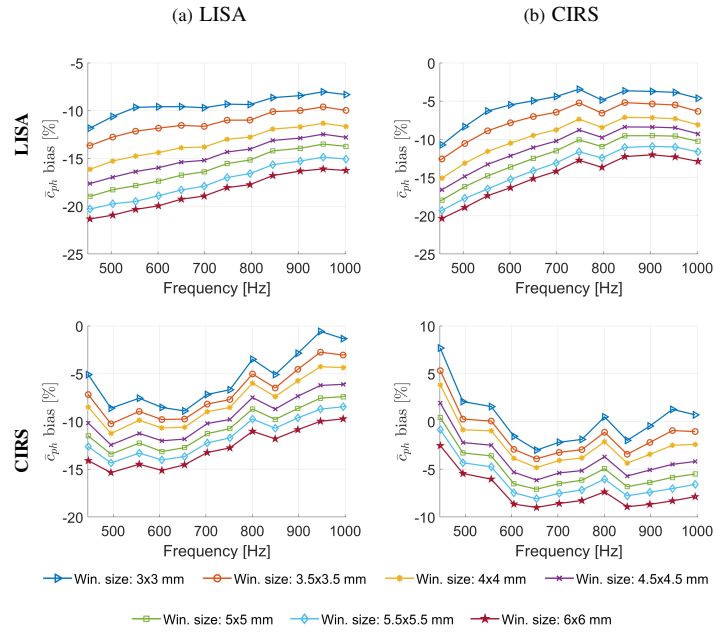

Fig. S3: Bias of the mean phase velocity computed for LISA data and CIRS phantom with stepped cylinders for inclusion. Results are presented for various frequencies and the spatial window dimensions for (a) nominal elasticity provided by manufacturer, and (b) phase velocity calculated using classical 2D-FT method. ROI for the inclusion is marked in Fig. 2 in the main manuscript.

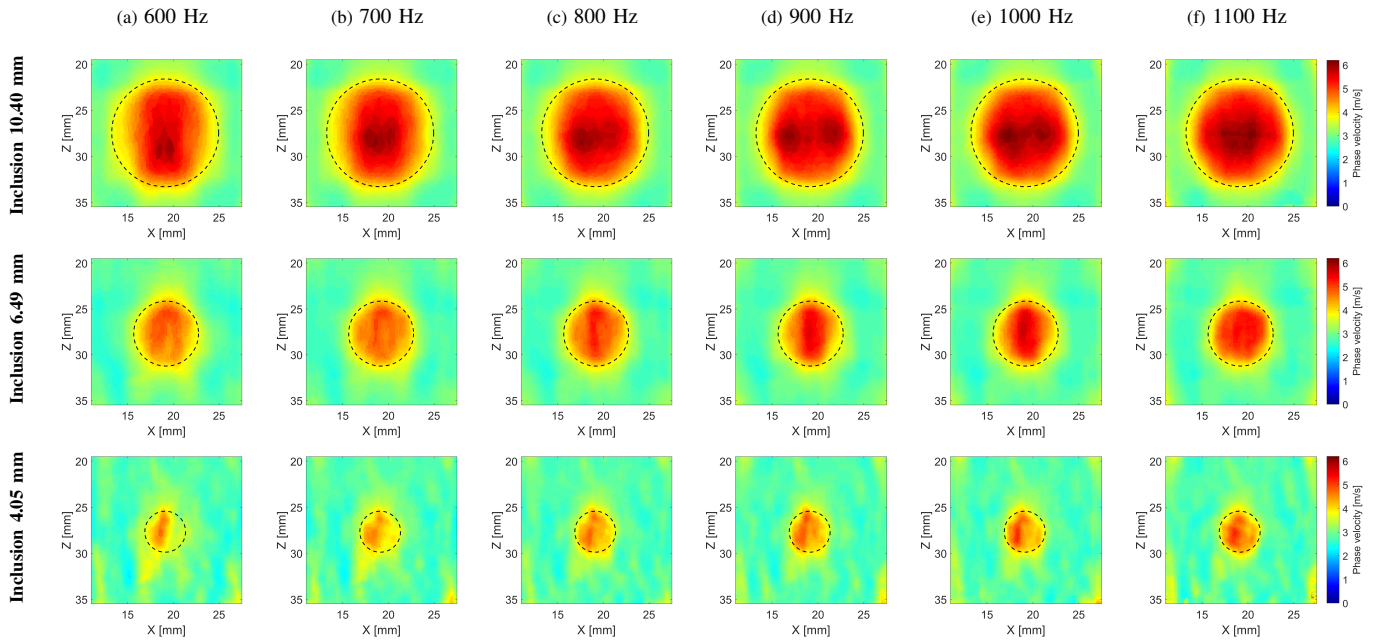

Fig. S4: Two-dimensional shear wave phase velocity images for the inclusion size of 10.40 (top row), 6.49 (middle row) and 4.05 (bottom row) diameter, respectively. Phase velocity images were calculated using LPVI approach. Presented images are computed for the CIRS phantom with an inclusion Type IV. Dashed lines present a true inclusion location estimated from B-modes.

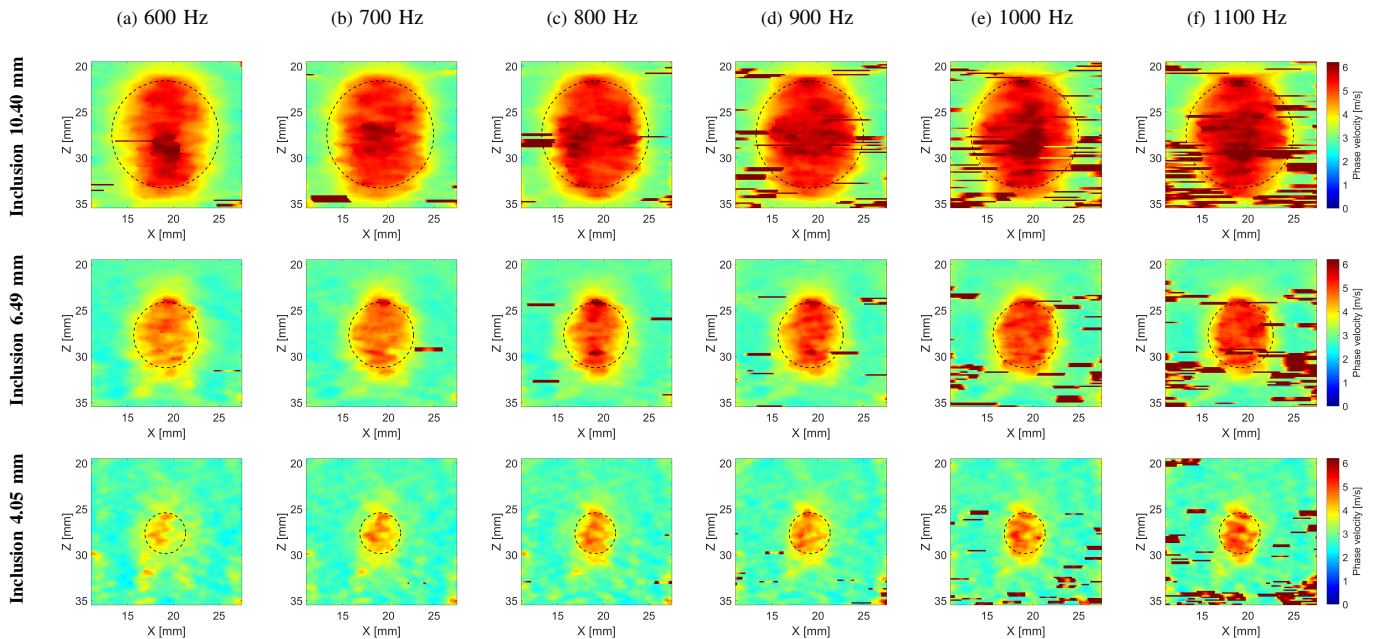

Fig. S5: Two-dimensional shear wave phase velocity images for the inclusion size of 10.40 (top row), 6.49 (middle row) and 4.05 (bottom row) diameter, respectively. Phase velocity images were calculated using phase velocity approach described by Budelli, et al. Presented images are computed for the CIRS phantom with an inclusion Type IV. Dashed lines present a true inclusion location estimated from B-modes.

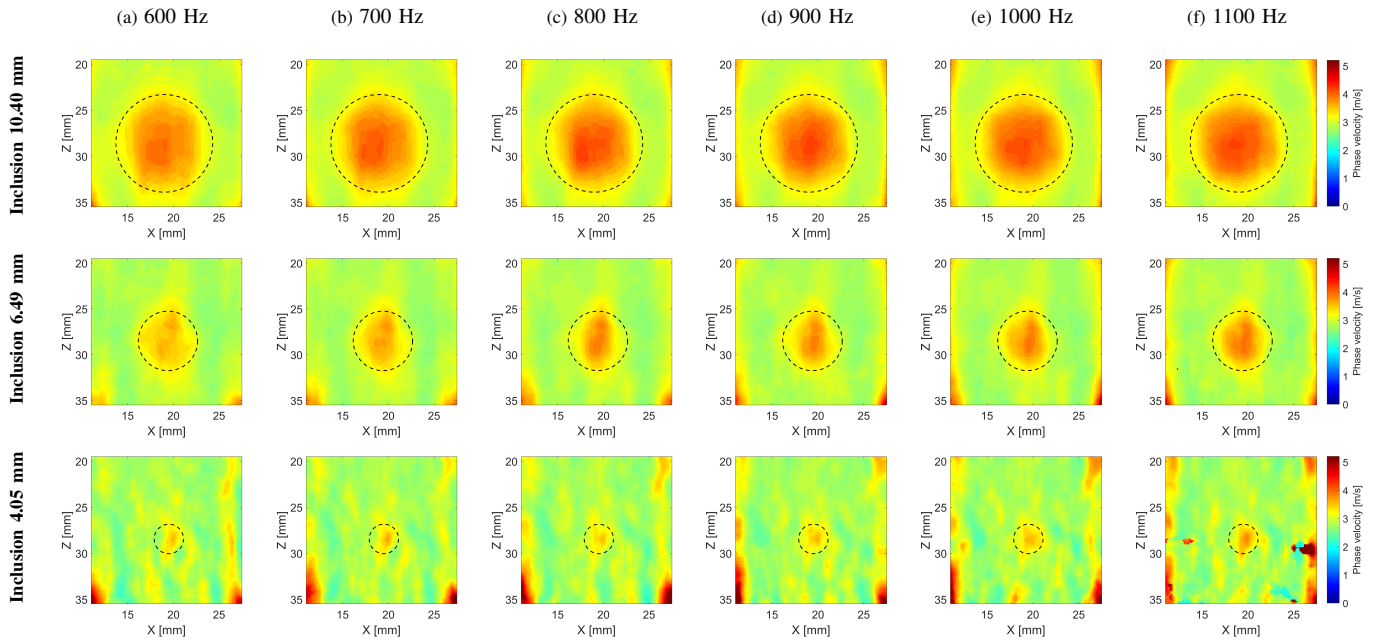

Fig. S6: Two-dimensional shear wave phase velocity images for the inclusion size of 10.40 (top row), 6.49 (middle row) and 4.05 (bottom row) diameter, respectively. Phase velocity images were calculated using LPVI approach. Presented images are computed for the CIRS phantom with an inclusion Type III. Dashed lines present a true inclusion location estimated from B-modes.

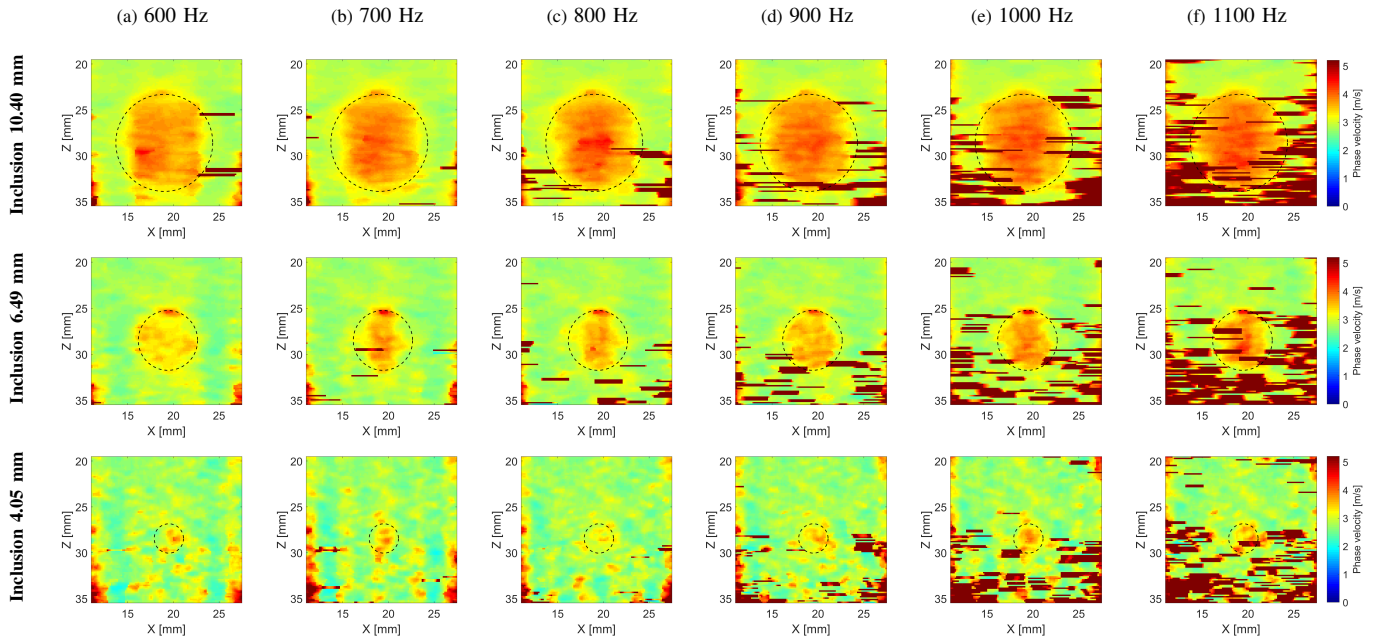

Fig. S7: Two-dimensional shear wave phase velocity images for the inclusion size of 10.40 (top row), 6.49 (middle row) and 4.05 (bottom row) diameter, respectively. Phase velocity images were calculated using phase velocity approach described by Budelli, et al. Presented images are computed for the CIRS phantom with an inclusion Type III. Dashed lines present a true inclusion location estimated from B-modes.

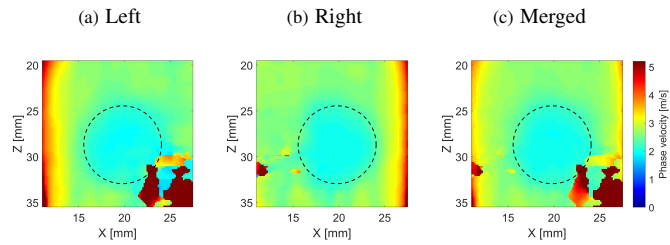

Fig. S8: Two-dimensional shear wave phase velocity images reconstructed using LPVI for the inclusion Type II and size of 10.40 mm diameter. A single frequency of 1000 Hz was applied. Reconstructions for the excitation push beam located on the (a) left and (b) right sides of the inclusion are presented. (c) presents merged image from (a) and (b). Dashed lines present a true inclusion location estimated from B-mode.

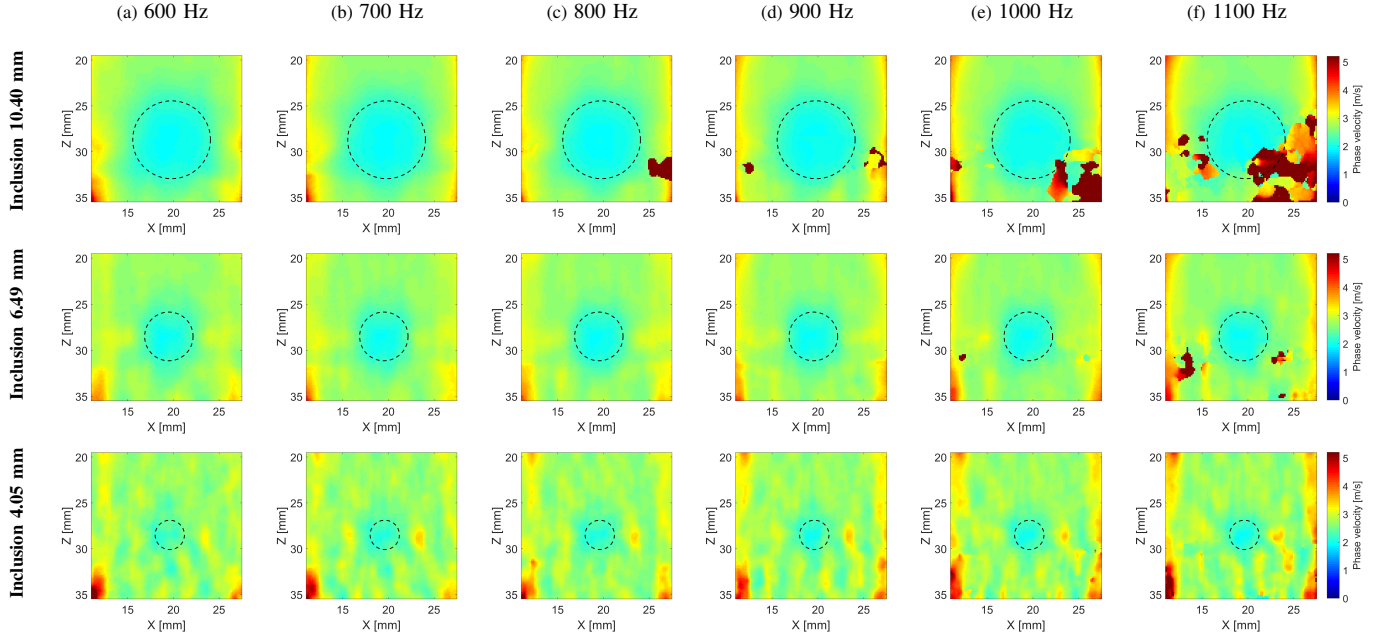

Fig. S9: Two-dimensional shear wave phase velocity images for the inclusion size of 10.40 (top row), 6.49 (middle row) and 4.05 (bottom row) diameter, respectively. Phase velocity images were calculated using LPVI approach. Presented images are computed for the CIRS phantom with an inclusion Type II. Dashed lines present a true inclusion location estimated from B-modes.

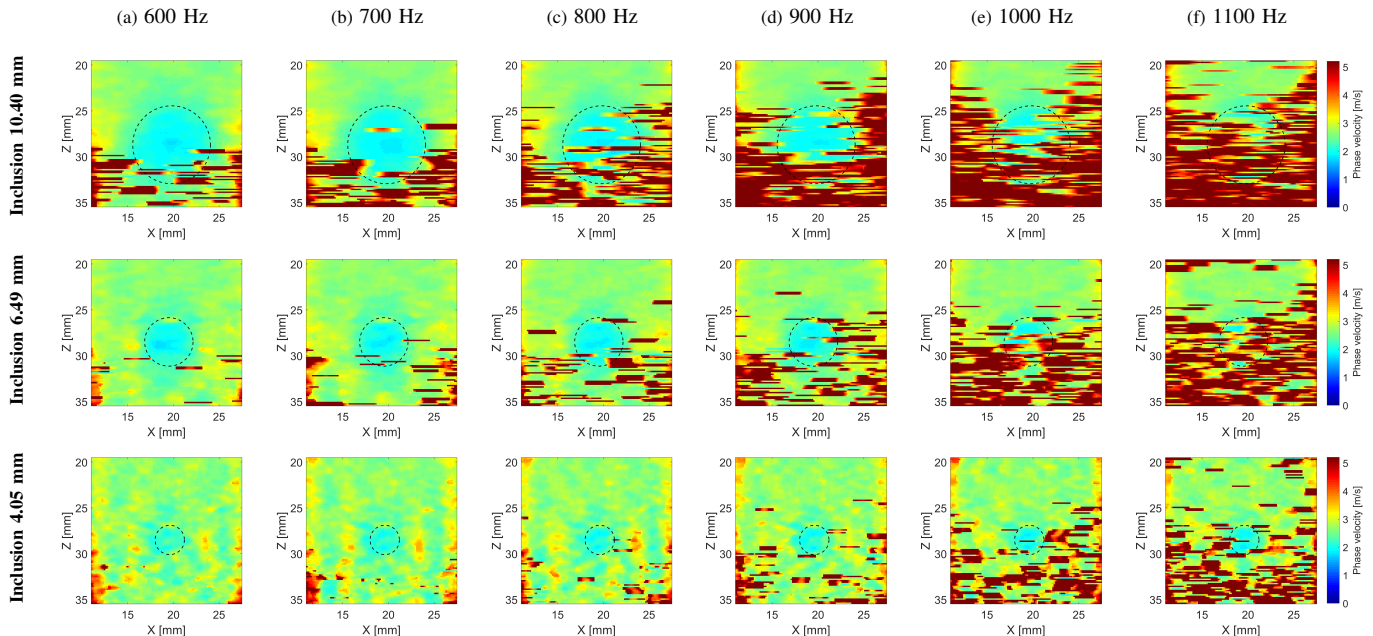

Fig. S10: Two-dimensional shear wave phase velocity images for the inclusion size of 10.40 (top row), 6.49 (middle row) and 4.05 (bottom row) diameter, respectively. Phase velocity images were calculated using phase velocity approach described by Budelli, et al. Presented images are computed for the CIRS phantom with an inclusion Type II. Dashed lines present a true inclusion location estimated from B-modes.

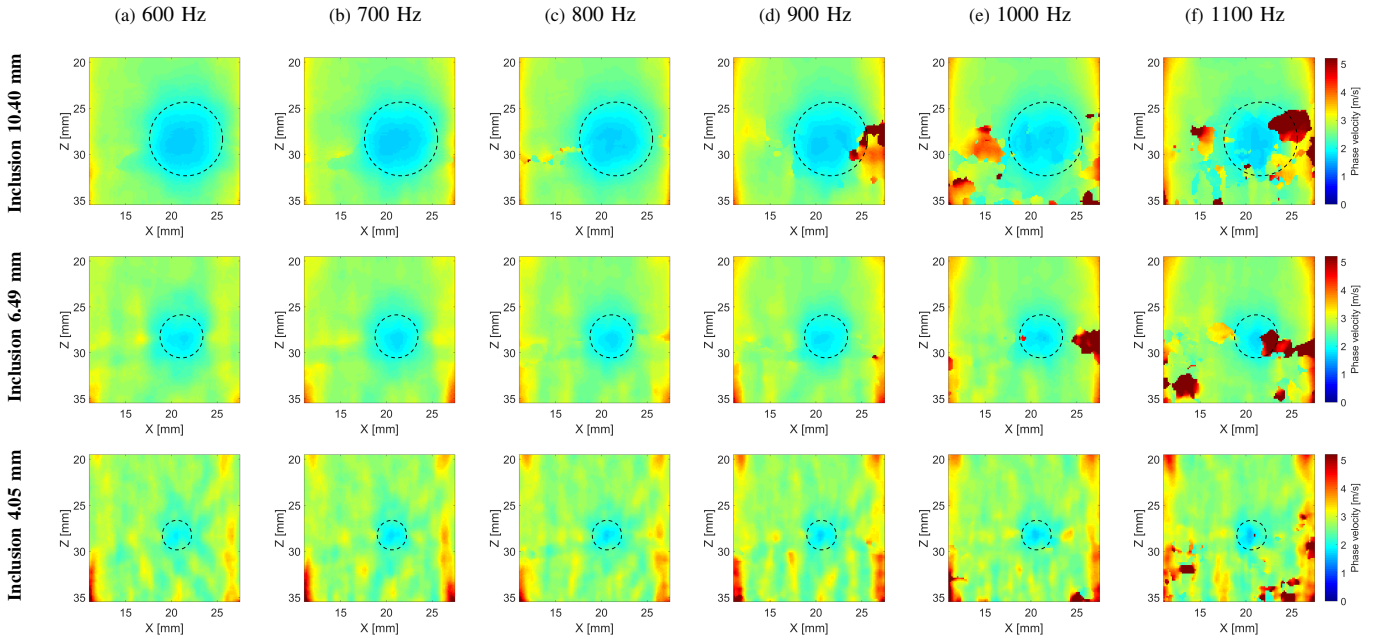

Fig. S11: Two-dimensional shear wave phase velocity images for the inclusion size of 10.40 (top row), 6.49 (middle row) and 4.05 (bottom row) diameter, respectively. Phase velocity images were calculated using LPVI approach. Presented images are computed for the CIRS phantom with an inclusion Type I. Dashed lines present a true inclusion location estimated from B-modes.

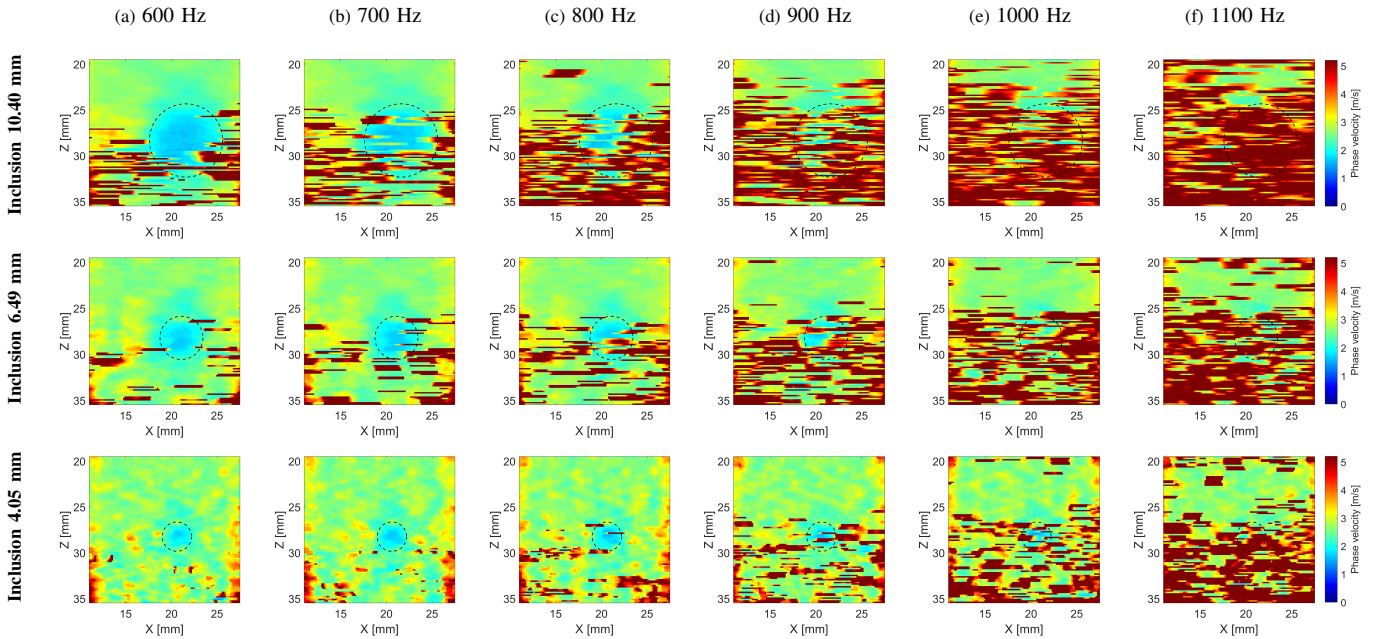

Fig. S12: Two-dimensional shear wave phase velocity images for the inclusion size of 10.40 (top row), 6.49 (middle row) and 4.05 (bottom row) diameter, respectively. Phase velocity images were calculated using phase velocity approach described by Budelli, et al. Presented images are computed for the CIRS phantom with an inclusion Type I. Dashed lines present a true inclusion location estimated from B-modes.



TABLE S4: Mean, median, standard deviation, variance, maximum and minimum values of shear wave velocity calculated for the inclusion Type IV and various sizes for LPVI approach. Values are presented in the unit of m/s. A nominal Young's modulus provided by the manufacturer is 80 kPa ( $c = 5.164$  m/s).

| Inclusion | Variable | Frequency [Hz] |       |       |       |       |       |
|-----------|----------|----------------|-------|-------|-------|-------|-------|
|           |          | 600            | 700   | 800   | 900   | 1000  | 1100  |
| 10.40 mm  | MEAN     | 4.716          | 4.783 | 4.844 | 4.907 | 4.959 | 4.971 |
|           | MEDIAN   | 4.727          | 4.767 | 4.897 | 5.001 | 5.028 | 5.051 |
|           | STD      | 0.608          | 0.646 | 0.646 | 0.647 | 0.675 | 0.671 |
|           | VAR      | 0.370          | 0.417 | 0.418 | 0.418 | 0.455 | 0.450 |
|           | MAX      | 5.958          | 6.143 | 6.132 | 6.030 | 6.151 | 6.119 |
|           | MIN      | 3.528          | 3.466 | 3.463 | 3.556 | 3.605 | 3.608 |
| 6.49 mm   | MEAN     | 4.384          | 4.441 | 4.518 | 4.571 | 4.635 | 4.671 |
|           | MEDIAN   | 4.426          | 4.509 | 4.556 | 4.538 | 4.605 | 4.774 |
|           | STD      | 0.338          | 0.304 | 0.401 | 0.539 | 0.578 | 0.497 |
|           | VAR      | 0.114          | 0.092 | 0.161 | 0.290 | 0.334 | 0.247 |
|           | MAX      | 5.011          | 5.092 | 5.403 | 5.547 | 5.804 | 5.421 |
|           | MIN      | 3.600          | 3.633 | 3.598 | 3.536 | 3.486 | 3.482 |
| 4.05 mm   | MEAN     | 3.898          | 4.044 | 4.187 | 4.249 | 4.271 | 4.362 |
|           | MEDIAN   | 3.838          | 4.022 | 4.201 | 4.281 | 4.237 | 4.356 |
|           | STD      | 0.391          | 0.291 | 0.282 | 0.337 | 0.361 | 0.356 |
|           | VAR      | 0.153          | 0.085 | 0.079 | 0.114 | 0.130 | 0.127 |
|           | MAX      | 4.782          | 4.613 | 4.757 | 4.892 | 5.149 | 5.210 |
|           | MIN      | 3.141          | 3.377 | 3.453 | 3.368 | 3.459 | 3.521 |

TABLE S5: Mean, median, standard deviation, variance, maximum and minimum values of shear wave velocity calculated for the inclusion Type IV and various sizes for phase velocity approach described by Budelli et al. Values are presented in the unit of m/s. A nominal Young's modulus provided by the manufacturer is 80 kPa ( $c = 5.164$  m/s).

| Inclusion | Variable | Frequency [Hz] |       |       |       |       |       |
|-----------|----------|----------------|-------|-------|-------|-------|-------|
|           |          | 600            | 700   | 800   | 900   | 1000  | 1100  |
| 10.40 mm  | MEAN     | 4.801          | 4.907 | 5.083 | 5.162 | 5.238 | 5.303 |
|           | MEDIAN   | 4.877          | 5.038 | 5.205 | 5.259 | 5.324 | 5.408 |
|           | STD      | 0.671          | 0.574 | 0.574 | 0.557 | 0.622 | 0.586 |
|           | VAR      | 0.450          | 0.329 | 0.329 | 0.311 | 0.387 | 0.343 |
|           | MAX      | 6.784          | 6.100 | 6.911 | 6.310 | 6.925 | 6.996 |
|           | MIN      | 3.283          | 3.226 | 3.316 | 3.493 | 2.907 | 3.525 |
| 6.49 mm   | MEAN     | 4.326          | 4.440 | 4.589 | 4.664 | 4.773 | 4.875 |
|           | MEDIAN   | 4.347          | 4.527 | 4.665 | 4.747 | 4.859 | 4.971 |
|           | STD      | 0.332          | 0.372 | 0.565 | 0.507 | 0.413 | 0.503 |
|           | VAR      | 0.110          | 0.138 | 0.319 | 0.257 | 0.170 | 0.253 |
|           | MAX      | 5.344          | 5.546 | 6.460 | 6.775 | 5.712 | 6.989 |
|           | MIN      | 3.494          | 3.476 | 3.381 | 3.412 | 3.501 | 3.476 |
| 4.05 mm   | MEAN     | 3.783          | 4.075 | 4.189 | 4.223 | 4.375 | 4.458 |
|           | MEDIAN   | 3.758          | 4.075 | 4.249 | 4.236 | 4.372 | 4.537 |
|           | STD      | 0.366          | 0.370 | 0.395 | 0.350 | 0.406 | 0.484 |
|           | VAR      | 0.134          | 0.137 | 0.156 | 0.122 | 0.165 | 0.234 |
|           | MAX      | 4.599          | 5.037 | 5.054 | 5.274 | 5.619 | 5.599 |
|           | MIN      | 3.026          | 3.213 | 3.165 | 3.299 | 3.335 | 3.230 |

TABLE S6: Mean, median, standard deviation, variance, maximum and minimum values of shear wave velocity calculated for the inclusion Type III and various sizes for LPVI approach. Values are presented in the unit of m/s. A nominal Young's modulus provided by the manufacturer is 45 kPa ( $c = 3.873$  m/s).

| Inclusion | Variable | Frequency [Hz] |       |       |       |       |       |
|-----------|----------|----------------|-------|-------|-------|-------|-------|
|           |          | 600            | 700   | 800   | 900   | 1000  | 1100  |
| 10.40 mm  | MEAN     | 3.535          | 3.566 | 3.594 | 3.591 | 3.612 | 3.624 |
|           | MEDIAN   | 3.536          | 3.549 | 3.572 | 3.568 | 3.605 | 3.625 |
|           | STD      | 0.251          | 0.273 | 0.313 | 0.307 | 0.296 | 0.301 |
|           | VAR      | 0.063          | 0.075 | 0.098 | 0.094 | 0.087 | 0.091 |
|           | MAX      | 4.054          | 4.100 | 4.203 | 4.223 | 4.183 | 4.148 |
|           | MIN      | 3.016          | 2.991 | 2.989 | 2.973 | 2.996 | 2.994 |
| 6.49 mm   | MEAN     | 3.351          | 3.363 | 3.372 | 3.366 | 3.397 | 3.432 |
|           | MEDIAN   | 3.343          | 3.355 | 3.350 | 3.330 | 3.387 | 3.416 |
|           | STD      | 0.144          | 0.201 | 0.267 | 0.244 | 0.261 | 0.272 |
|           | VAR      | 0.021          | 0.040 | 0.071 | 0.060 | 0.068 | 0.074 |
|           | MAX      | 3.660          | 3.797 | 3.883 | 3.876 | 3.966 | 3.962 |
|           | MIN      | 2.868          | 2.813 | 2.806 | 2.794 | 2.758 | 2.793 |
| 4.05 mm   | MEAN     | 3.132          | 3.178 | 3.195 | 3.241 | 3.283 | 3.323 |
|           | MEDIAN   | 3.198          | 3.208 | 3.221 | 3.244 | 3.290 | 3.332 |
|           | STD      | 0.238          | 0.226 | 0.158 | 0.152 | 0.157 | 0.243 |
|           | VAR      | 0.057          | 0.051 | 0.025 | 0.023 | 0.025 | 0.059 |
|           | MAX      | 3.595          | 3.690 | 3.551 | 3.597 | 3.605 | 3.869 |
|           | MIN      | 2.644          | 2.693 | 2.833 | 2.920 | 2.956 | 2.832 |

TABLE S7: Mean, median, standard deviation, variance, maximum and minimum values of shear wave velocity calculated for the inclusion Type III and various sizes for phase velocity approach described by Budelli et al. Values are presented in the unit of m/s. A nominal Young's modulus provided by the manufacturer is 45 kPa ( $c = 3.873$  m/s).

| Inclusion | Variable | Frequency [Hz] |       |       |       |       |       |
|-----------|----------|----------------|-------|-------|-------|-------|-------|
|           |          | 600            | 700   | 800   | 900   | 1000  | 1100  |
| 10.40 mm  | MEAN     | 3.552          | 3.586 | 3.660 | 3.692 | 3.766 | 3.933 |
|           | MEDIAN   | 3.588          | 3.624 | 3.637 | 3.703 | 3.741 | 3.820 |
|           | STD      | 0.274          | 0.284 | 0.361 | 0.379 | 0.439 | 0.617 |
|           | VAR      | 0.075          | 0.081 | 0.130 | 0.143 | 0.193 | 0.381 |
|           | MAX      | 6.852          | 4.247 | 6.814 | 6.970 | 6.992 | 6.974 |
|           | MIN      | 2.780          | 2.851 | 2.835 | 2.862 | 2.887 | 2.927 |
| 6.49 mm   | MEAN     | 3.308          | 3.381 | 3.358 | 3.441 | 3.527 | 3.638 |
|           | MEDIAN   | 3.301          | 3.364 | 3.358 | 3.456 | 3.521 | 3.557 |
|           | STD      | 0.162          | 0.400 | 0.278 | 0.337 | 0.402 | 0.604 |
|           | VAR      | 0.026          | 0.160 | 0.077 | 0.113 | 0.162 | 0.365 |
|           | MAX      | 4.271          | 6.549 | 4.395 | 6.849 | 6.874 | 6.966 |
|           | MIN      | 2.832          | 2.682 | 2.689 | 2.793 | 2.715 | 2.739 |
| 4.05 mm   | MEAN     | 3.145          | 3.247 | 3.091 | 3.249 | 3.372 | 3.529 |
|           | MEDIAN   | 3.121          | 3.244 | 3.064 | 3.227 | 3.349 | 3.348 |
|           | STD      | 0.324          | 0.304 | 0.159 | 0.241 | 0.278 | 0.685 |
|           | VAR      | 0.105          | 0.093 | 0.025 | 0.058 | 0.077 | 0.470 |
|           | MAX      | 4.064          | 3.994 | 3.611 | 3.939 | 3.984 | 6.796 |
|           | MIN      | 2.411          | 2.541 | 2.679 | 2.646 | 2.579 | 2.610 |

TABLE S8: Mean, median, standard deviation, variance, maximum and minimum values of shear wave velocity calculated for the inclusion Type II and various sizes for LPVI approach. Values are presented in the unit of m/s. A nominal Young's modulus provided by the manufacturer is 14 kPa ( $c = 2.160$  m/s).

| Inclusion | Variable | Frequency [Hz] |       |       |       |       |       |
|-----------|----------|----------------|-------|-------|-------|-------|-------|
|           |          | 600            | 700   | 800   | 900   | 1000  | 1100  |
| 10.40 mm  | MEAN     | 2.048          | 2.044 | 2.046 | 2.051 | 2.108 | 2.397 |
|           | MEDIAN   | 2.037          | 2.037 | 2.037 | 2.035 | 2.053 | 2.074 |
|           | STD      | 0.088          | 0.090 | 0.091 | 0.090 | 0.336 | 0.981 |
|           | VAR      | 0.008          | 0.008 | 0.008 | 0.008 | 0.113 | 0.963 |
|           | MAX      | 2.333          | 2.313 | 2.335 | 2.340 | 5.716 | 6.999 |
|           | MIN      | 1.900          | 1.897 | 1.908 | 1.915 | 1.933 | 1.904 |
| 6.49 mm   | MEAN     | 2.116          | 2.102 | 2.077 | 2.093 | 2.102 | 2.099 |
|           | MEDIAN   | 2.120          | 2.096 | 2.077 | 2.096 | 2.100 | 2.095 |
|           | STD      | 0.101          | 0.102 | 0.093 | 0.094 | 0.099 | 0.105 |
|           | VAR      | 0.010          | 0.011 | 0.009 | 0.009 | 0.010 | 0.011 |
|           | MAX      | 2.351          | 2.406 | 2.316 | 2.319 | 2.395 | 2.426 |
|           | MIN      | 1.923          | 1.908 | 1.910 | 1.925 | 1.912 | 1.922 |
| 4.05 mm   | MEAN     | 2.315          | 2.228 | 2.197 | 2.188 | 2.165 | 2.133 |
|           | MEDIAN   | 2.319          | 2.227 | 2.204 | 2.181 | 2.174 | 2.146 |
|           | STD      | 0.099          | 0.093 | 0.090 | 0.147 | 0.116 | 0.111 |
|           | VAR      | 0.010          | 0.009 | 0.008 | 0.022 | 0.014 | 0.012 |
|           | MAX      | 2.569          | 2.487 | 2.346 | 2.554 | 2.390 | 2.391 |
|           | MIN      | 2.135          | 2.050 | 2.019 | 1.948 | 1.954 | 1.926 |

TABLE S9: Mean, median, standard deviation, variance, maximum and minimum values of shear wave velocity calculated for the inclusion Type II and various sizes for phase velocity approach described by Budelli et al. Values are presented in the unit of m/s. A nominal Young's modulus provided by the manufacturer is 14 kPa ( $c = 2.160$  m/s).

| Inclusion | Variable | Frequency [Hz] |       |       |       |       |       |
|-----------|----------|----------------|-------|-------|-------|-------|-------|
|           |          | 600            | 700   | 800   | 900   | 1000  | 1100  |
| 10.40 mm  | MEAN     | 2.205          | 2.263 | 2.641 | 2.601 | 3.065 | 3.642 |
|           | MEDIAN   | 2.014          | 2.042 | 2.130 | 2.109 | 2.615 | 3.317 |
|           | STD      | 0.682          | 0.709 | 1.068 | 0.972 | 1.222 | 1.282 |
|           | VAR      | 0.466          | 0.503 | 1.142 | 0.944 | 1.493 | 1.645 |
|           | MAX      | 6.951          | 6.993 | 6.996 | 6.992 | 6.992 | 6.991 |
|           | MIN      | 1.765          | 1.788 | 1.785 | 1.827 | 1.857 | 1.863 |
| 6.49 mm   | MEAN     | 2.078          | 2.115 | 2.238 | 2.416 | 3.282 | 3.510 |
|           | MEDIAN   | 2.056          | 2.069 | 2.050 | 2.095 | 2.975 | 3.194 |
|           | STD      | 0.194          | 0.344 | 0.692 | 0.938 | 1.286 | 1.245 |
|           | VAR      | 0.038          | 0.118 | 0.479 | 0.881 | 1.655 | 1.551 |
|           | MAX      | 3.062          | 6.179 | 6.123 | 6.994 | 6.932 | 6.980 |
|           | MIN      | 1.714          | 1.779 | 1.794 | 1.699 | 1.841 | 1.864 |
| 4.05 mm   | MEAN     | 2.263          | 2.162 | 2.160 | 2.169 | 2.251 | 2.300 |
|           | MEDIAN   | 2.225          | 2.149 | 2.131 | 2.135 | 2.099 | 2.100 |
|           | STD      | 0.179          | 0.150 | 0.290 | 0.206 | 0.606 | 0.716 |
|           | VAR      | 0.032          | 0.023 | 0.084 | 0.042 | 0.367 | 0.512 |
|           | MAX      | 2.970          | 2.849 | 6.141 | 2.939 | 6.916 | 6.397 |
|           | MIN      | 1.986          | 1.846 | 1.839 | 1.840 | 1.792 | 1.808 |

TABLE S10: Mean, median, standard deviation, variance, maximum and minimum values of shear wave velocity calculated for the inclusion Type I and various sizes for LPVI approach. Values are presented in the unit of m/s. A nominal Young's modulus provided by the manufacturer is 8 kPa ( $c = 1.633$  m/s).

| Inclusion | Variable | Frequency [Hz] |       |       |       |       |       |
|-----------|----------|----------------|-------|-------|-------|-------|-------|
|           |          | 600            | 700   | 800   | 900   | 1000  | 1100  |
| 10.40 mm  | MEAN     | 1.848          | 1.865 | 1.887 | 2.061 | 1.923 | 2.361 |
|           | MEDIAN   | 1.832          | 1.844 | 1.872 | 1.867 | 1.890 | 2.014 |
|           | STD      | 0.126          | 0.146 | 0.145 | 0.747 | 0.182 | 0.975 |
|           | VAR      | 0.016          | 0.021 | 0.021 | 0.558 | 0.033 | 0.952 |
|           | MAX      | 2.238          | 2.325 | 2.283 | 6.824 | 3.121 | 6.998 |
|           | MIN      | 1.653          | 1.649 | 1.658 | 1.657 | 1.684 | 1.626 |
| 6.49 mm   | MEAN     | 1.947          | 1.933 | 1.938 | 1.931 | 1.986 | 2.454 |
|           | MEDIAN   | 1.947          | 1.943 | 1.943 | 1.935 | 1.950 | 2.008 |
|           | STD      | 0.098          | 0.102 | 0.105 | 0.096 | 0.327 | 1.269 |
|           | VAR      | 0.010          | 0.010 | 0.011 | 0.009 | 0.107 | 1.610 |
|           | MAX      | 2.221          | 2.158 | 2.200 | 2.180 | 4.588 | 6.923 |
|           | MIN      | 1.749          | 1.715 | 1.714 | 1.747 | 1.670 | 1.695 |
| 4.05 mm   | MEAN     | 2.092          | 2.014 | 2.017 | 2.029 | 2.013 | 2.043 |
|           | MEDIAN   | 2.084          | 2.010 | 2.018 | 2.017 | 2.004 | 1.993 |
|           | STD      | 0.121          | 0.134 | 0.142 | 0.164 | 0.171 | 0.342 |
|           | VAR      | 0.015          | 0.018 | 0.020 | 0.027 | 0.029 | 0.117 |
|           | MAX      | 2.412          | 2.443 | 2.346 | 2.514 | 2.486 | 6.460 |
|           | MIN      | 1.823          | 1.733 | 1.703 | 1.655 | 1.635 | 1.584 |

TABLE S11: Mean, median, standard deviation, variance, maximum and minimum values of shear wave velocity calculated for the inclusion Type I and various sizes for phase velocity approach described by Budelli et al. Values are presented in the unit of m/s. A nominal Young's modulus provided by the manufacturer is 8 kPa ( $c = 1.633$  m/s).

| Inclusion | Variable | Frequency [Hz] |       |       |       |       |       |
|-----------|----------|----------------|-------|-------|-------|-------|-------|
|           |          | 600            | 700   | 800   | 900   | 1000  | 1100  |
| 10.40 mm  | MEAN     | 2.068          | 2.529 | 3.061 | 3.541 | 3.905 | 4.583 |
|           | MEDIAN   | 1.843          | 2.101 | 2.595 | 3.249 | 3.739 | 4.544 |
|           | STD      | 0.769          | 1.122 | 1.304 | 1.316 | 1.309 | 1.235 |
|           | VAR      | 0.591          | 1.259 | 1.700 | 1.733 | 1.712 | 1.526 |
|           | MAX      | 6.964          | 6.996 | 6.999 | 6.990 | 6.986 | 6.998 |
|           | MIN      | 1.436          | 1.560 | 1.466 | 1.616 | 1.819 | 1.975 |
| 6.49 mm   | MEAN     | 1.986          | 2.106 | 2.656 | 3.213 | 3.454 | 3.703 |
|           | MEDIAN   | 1.914          | 1.911 | 2.114 | 2.704 | 3.109 | 3.340 |
|           | STD      | 0.389          | 0.737 | 1.145 | 1.379 | 1.287 | 1.418 |
|           | VAR      | 0.151          | 0.543 | 1.311 | 1.903 | 1.656 | 2.011 |
|           | MAX      | 6.381          | 6.906 | 6.855 | 6.999 | 6.982 | 6.998 |
|           | MIN      | 1.614          | 1.629 | 1.641 | 1.669 | 1.628 | 1.741 |
| 4.05 mm   | MEAN     | 2.081          | 1.978 | 2.068 | 2.404 | 2.922 | 3.857 |
|           | MEDIAN   | 2.036          | 1.963 | 1.971 | 2.117 | 2.394 | 3.638 |
|           | STD      | 0.241          | 0.223 | 0.567 | 0.948 | 1.312 | 1.438 |
|           | VAR      | 0.058          | 0.050 | 0.322 | 0.898 | 1.720 | 2.069 |
|           | MAX      | 2.753          | 2.671 | 6.565 | 6.674 | 6.992 | 6.905 |
|           | MIN      | 1.665          | 1.622 | 1.544 | 1.548 | 1.400 | 1.875 |

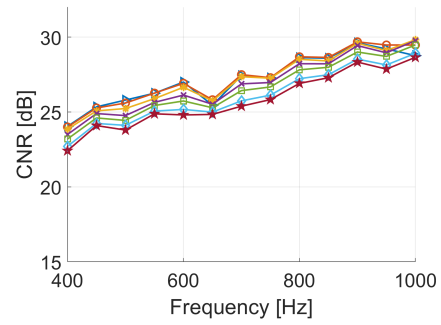

Fig. S13: The contrast-to-noise ratio (CNR) estimated for the LPVI, computed for various frequencies and the spatial window dimensions like in other plots, calculated for the gelatin phantom with the excised porcine liver inclusion.
